# Supplementary material for: ADCY5, CAPN10 and JAZF1 Gene Polymorphisms and Placental Expression in Women with Gestational Diabetes
Source: MDPI journal article supplement (doi:10.3390/life11080806), 2021-08-09
Supplement: s1 [file s1]

Supplementary data of:

# ADCY5, CAPN10 and JAZF1 Gene Polymorphisms and Placental Expression in Women with Gestational Diabetes

Przemysław Ustianowski <sup>1</sup>, Damian Malinowski <sup>2</sup>, Patrycja Kopytko <sup>3</sup>, Michał Czerewaty <sup>3</sup>, Maciej Tarnowski <sup>3</sup>, Violetta Dziedziejko <sup>4</sup>, Krzysztof Safranow <sup>4</sup> and Andrzej Pawlik <sup>3,\*</sup>

<sup>1</sup> Department of Obstetrics and Gynecology, Pomeranian Medical University, 70-111 Szczecin, Poland; przemyslaw.ustianowski@pum.edu.pl

<sup>2</sup> Department of Experimental and Clinical Pharmacology, Pomeranian Medical University, 70-111 Szczecin, Poland; damian.malinowski@pum.edu.pl

<sup>3</sup> Department of Physiology, Pomeranian Medical University, 70-111 Szczecin, Poland; patrycja.kopytko@op.pl (P.K.); michal.czerewaty@wp.pl (M.C.); maciejt@pum.edu.pl (M.T.)

<sup>4</sup> Department of Biochemistry and Medical Chemistry, Pomeranian Medical University, 70-111 Szczecin, Poland; viola@pum.edu.pl (V.D.); chrissaf@mp.pl (K.S.)

\* Correspondence: pawand@poczta.onet.pl

**Table S1.** Clinical parameters of women with GDM stratified according to *ADCY5* rs11708067 genotype.

| Parameters                                                  | <i>ADCY5</i> rs11708067 Genotype |            |            |                |                    |             |
|-------------------------------------------------------------|----------------------------------|------------|------------|----------------|--------------------|-------------|
|                                                             | AA<br>n=193                      | AG<br>n=71 | GG<br>n=8  | AA<br>vs<br>AG | AA vs<br>GG        | AG vs<br>GG |
|                                                             | Mean ± SD                        | Mean ± SD  | Mean ± SD  |                | p <sup>&amp;</sup> |             |
| Fasting glucose in an oral glucose tolerance test (mg/dL)   | 95.6±12.4                        | 96.6±10.1  | 97.0±10.4  | 0.11           | 0.64               | 0.43        |
| Glucose after 1 h in an oral glucose tolerance test (mg/dL) | 155.4±36.2                       | 158.9±41.2 | 151.1±33.1 | 0.62           | 0.89               | 0.72        |
| Glucose after 2 h in an oral glucose tolerance test (mg/dL) | 131.6±36.5                       | 128.4±30.5 | 118.5±28.3 | 0.60           | 0.35               | 0.44        |
| Daily insulin requirement [unit]                            | 14.5±21.7                        | 26.7±43.2  | 10.5±13.6  | 0.002          | 1.00               | 0.20        |
| Body mass before pregnancy [kg]                             | 72.6±16.1                        | 75.1±18.5  | 76.1±21.7  | 0.44           | 0.81               | 0.99        |
| Body mass at birth [kg]                                     | 84.3±14.7                        | 86.3±17.5  | 87.1±18.5  | 0.58           | 0.84               | 0.97        |
| Body mass increase during pregnancy [kg]                    | 11.8±7.2                         | 11.2±6.8   | 11.0±6.5   | 0.44           | 0.75               | 0.94        |
| BMI before pregnancy [kg/m <sup>2</sup> ]                   | 26.4±5.6                         | 27.1±6.4   | 27.1±8.1   | 0.59           | 0.90               | 0.75        |
| BMI at birth [kg/m <sup>2</sup> ]                           | 30.7±5.2                         | 31.2±6.2   | 31.0±7.2   | 0.81           | 0.91               | 0.91        |
| BMI increase during pregnancy [kg/m <sup>2</sup> ]          | 4.3±2.6                          | 4.1±2.5    | 3.9±2.4    | 0.37           | 0.62               | 0.90        |
| Newborn body mass [g]                                       | 3281±566                         | 3282±552   | 3093±634   | 0.70           | 0.41               | 0.45        |
| APGAR [0-10]                                                | 9.2±1.1                          | 9.4±0.9    | 9.5±0.9    | 0.60           | 0.39               | 0.50        |

<sup>&</sup> Mann-Whitney U test.

**Table S2.** Clinical parameters of women with GDM stratified according to *ADCY5* rs2877716 genotype.

| Parameters                                                  | <i>ADCY5</i> rs2877716 Genotype |            |            |                |      |      |
|-------------------------------------------------------------|---------------------------------|------------|------------|----------------|------|------|
|                                                             | CC                              | CT         | TT         | CC             | CC   | CT   |
|                                                             | n=185                           | n=80       | n=7        | vs             | vs   | vs   |
|                                                             | CT                              | TT         | CT         | TT             | TT   | TT   |
|                                                             | Mean ± SD                       | Mean ± SD  | Mean ± SD  | p <sup>*</sup> |      |      |
| Fasting glucose in an oral glucose tolerance test (mg/dL)   | 95.5±12.7                       | 96.4±8.2   | 99.9±18.7  | 0.08           | 0.96 | 0.84 |
| Glucose after 1 h in an oral glucose tolerance test (mg/dL) | 155.2±36.5                      | 157.2±38.1 | 171.0±54.0 | 0.64           | 0.44 | 0.53 |
| Glucose after 2 h in an oral glucose tolerance test (mg/dL) | 132.0±37.1                      | 125.9±28.9 | 140.9±34.7 | 0.26           | 0.53 | 0.31 |
| Daily insulin requirement [unit]                            | 14.7±22.0                       | 24.2±41.1  | 17.4±25.6  | 0.015          | 0.80 | 0.57 |
| Body mass before pregnancy [kg]                             | 72.6±16.3                       | 75.3±18.3  | 69.8±16.3  | 0.33           | 0.54 | 0.44 |
| Body mass at birth [kg]                                     | 84.3±15.0                       | 86.6±16.7  | 82.6±18.0  | 0.42           | 0.55 | 0.53 |
| Body mass increase during pregnancy [kg]                    | 11.7±7.1                        | 11.3±6.7   | 12.9±8.4   | 0.42           | 0.68 | 0.55 |
| BMI before pregnancy [kg/m <sup>2</sup> ]                   | 26.4±5.7                        | 27.1±6.4   | 25.1±6.0   | 0.57           | 0.42 | 0.33 |
| BMI at birth [kg/m <sup>2</sup> ]                           | 30.7±5.3                        | 31.2±6.0   | 29.7±6.7   | 0.71           | 0.43 | 0.43 |
| BMI increase during pregnancy [kg/m <sup>2</sup> ]          | 4.3±2.6                         | 4.1±2.5    | 4.6±3.1    | 0.30           | 0.78 | 0.63 |
| Newborn body mass [g]                                       | 3263±554                        | 3297±584   | 3370±618   | 0.73           | 0.64 | 0.82 |
| APGAR [0-10]                                                | 9.2±1.1                         | 9.3±0.9    | 9.4±1.0    | 0.90           | 0.58 | 0.61 |

\*Mann-Whitney U test.

**Table S3.** Clinical parameters of women with GDM stratified according to *CAPN10* rs2975760 genotype.

| Parameters                                                  | <i>CAPN10</i> rs2975760 Genotype |            |            |                |       |      |
|-------------------------------------------------------------|----------------------------------|------------|------------|----------------|-------|------|
|                                                             | TT                               | TC         | CC         | TT             | TT vs | TC   |
|                                                             | n=196                            | n=67       | n=7        | vs             | CC    | vs   |
|                                                             | TC                               | CC         | TC         | CC             | CC    | CC   |
|                                                             | Mean ± SD                        | Mean ± SD  | Mean ± SD  | p <sup>*</sup> |       |      |
| Fasting glucose in an oral glucose tolerance test (mg/dL)   | 95.8±12.2                        | 96.3±10.8  | 93.7±8.6   | 0.32           | 0.72  | 0.55 |
| Glucose after 1 h in an oral glucose tolerance test (mg/dL) | 155.5±38.5                       | 158.5±33.1 | 159.7±51.7 | 0.32           | 0.82  | 0.93 |
| Glucose after 2 h in an oral glucose tolerance test (mg/dL) | 129.7±36.8                       | 133.7±29.5 | 120.7±30.5 | 0.21           | 0.58  | 0.28 |
| Daily insulin requirement [unit]                            | 17.1±31.6                        | 19.2±22.4  | 17.0±21.9  | 0.06           | 0.94  | 0.65 |
| Body mass before pregnancy [kg]                             | 73.6±17.4                        | 72.9±15.9  | 71.4±16.6  | 0.93           | 0.68  | 0.72 |
| Body mass at birth [kg]                                     | 85.4±15.8                        | 84.4±15.2  | 79.1±13.8  | 0.68           | 0.31  | 0.41 |
| Body mass increase during pregnancy [kg]                    | 11.8±6.9                         | 11.5±7.6   | 7.8±4.2    | 0.65           | 0.08  | 0.16 |
| BMI before pregnancy [kg/m <sup>2</sup> ]                   | 26.7±6.0                         | 26.5±5.7   | 25.7±5.6   | 0.92           | 0.71  | 0.71 |
| BMI at birth [kg/m <sup>2</sup> ]                           | 31.0±5.6                         | 30.7±5.6   | 28.5±4.3   | 0.65           | 0.23  | 0.37 |
| BMI increase during pregnancy [kg/m <sup>2</sup> ]          | 4.3±2.6                          | 4.2±2.8    | 2.8±1.5    | 0.65           | 0.08  | 0.17 |
| Newborn body mass [g]                                       | 3256±591                         | 3325±502   | 3416±177   | 0.74           | 0.48  | 0.39 |
| APGAR [0-10]                                                | 9.2±1.1                          | 9.4±0.9    | 10.0±0.0   | 0.14           | 0.02  | 0.04 |

\*Mann-Whitney U test.

**Table S4.** Clinical parameters of women with GDM stratified according to *CAPN10* rs3792267 genotype.

| Parameters                                                  | <i>CAPN10</i> rs3792267 Genotype |                  |                  |                    |          |          |
|-------------------------------------------------------------|----------------------------------|------------------|------------------|--------------------|----------|----------|
|                                                             | GG<br>n=132                      | GA<br>n=108      | AA<br>n=30       | GG<br>vs<br>GA     | GG vs AA | GA vs AA |
|                                                             | Mean $\pm$ SD                    | Mean $\pm$ SD    | Mean $\pm$ SD    | p <sup>&amp;</sup> |          |          |
| Fasting glucose in an oral glucose tolerance test (mg/dL)   | 96.0 $\pm$ 9.1                   | 96.4 $\pm$ 15.2  | 93.3 $\pm$ 7.0   | 0.63               | 0.13     | 0.17     |
| Glucose after 1 h in an oral glucose tolerance test (mg/dL) | 157.4 $\pm$ 36.2                 | 157.7 $\pm$ 40.2 | 146.9 $\pm$ 32.5 | 0.86               | 0.18     | 0.21     |
| Glucose after 2 h in an oral glucose tolerance test (mg/dL) | 130.4 $\pm$ 31.6                 | 133.7 $\pm$ 38.3 | 119.3 $\pm$ 34.9 | 0.91               | 0.09     | 0.11     |
| Daily insulin requirement [unit]                            | 17.2 $\pm$ 21.5                  | 20.2 $\pm$ 38.8  | 10.0 $\pm$ 14.8  | 0.67               | 0.08     | 0.15     |
| Body mass before pregnancy [kg]                             | 74.3 $\pm$ 18.1                  | 71.8 $\pm$ 15.9  | 75.1 $\pm$ 15.6  | 0.33               | 0.53     | 0.20     |
| Body mass at birth [kg]                                     | 85.5 $\pm$ 16.7                  | 83.5 $\pm$ 14.3  | 88.0 $\pm$ 15.0  | 0.44               | 0.33     | 0.08     |
| Body mass increase during pregnancy [kg]                    | 11.2 $\pm$ 7.0                   | 11.8 $\pm$ 7.1   | 12.9 $\pm$ 7.2   | 0.17               | 0.20     | 0.90     |
| BMI before pregnancy [kg/m <sup>2</sup> ]                   | 26.9 $\pm$ 6.2                   | 26.3 $\pm$ 5.7   | 26.5 $\pm$ 5.8   | 0.61               | 0.99     | 0.81     |
| BMI at birth [kg/m <sup>2</sup> ]                           | 31.0 $\pm$ 5.8                   | 30.7 $\pm$ 5.2   | 31.0 $\pm$ 5.4   | 0.94               | 0.87     | 0.70     |
| BMI increase during pregnancy [kg/m <sup>2</sup> ]          | 4.1 $\pm$ 2.6                    | 4.3 $\pm$ 2.6    | 4.5 $\pm$ 2.4    | 0.16               | 0.28     | 0.94     |
| Newborn body mass [g]                                       | 3314 $\pm$ 562                   | 3201 $\pm$ 515   | 3393 $\pm$ 705   | 0.04               | 0.15     | 0.01     |
| APGAR [0-10]                                                | 9.3 $\pm$ 0.9                    | 9.2 $\pm$ 1.0    | 9.0 $\pm$ 1.6    | 0.70               | 0.57     | 0.73     |

<sup>&</sup> Mann-Whitney U test.

**Table S5.** Clinical parameters of women with GDM stratified according to *JAZF1* rs864745 genotype.

| Parameters                                                  | <i>JAZF1</i> rs864745 Genotype |                  |                  |                    |          |          |
|-------------------------------------------------------------|--------------------------------|------------------|------------------|--------------------|----------|----------|
|                                                             | TT<br>n=79                     | CT<br>n=136      | CC<br>n=55       | TT<br>vs<br>CT     | TT vs CC | CT vs CC |
|                                                             | Mean $\pm$ SD                  | Mean $\pm$ SD    | Mean $\pm$ SD    | p <sup>&amp;</sup> |          |          |
| Fasting glucose in an oral glucose tolerance test (mg/dL)   | 96.3 $\pm$ 13.6                | 95.9 $\pm$ 11.9  | 95.2 $\pm$ 8.4   | 0.43               | 0.49     | 0.98     |
| Glucose after 1 h in an oral glucose tolerance test (mg/dL) | 157.5 $\pm$ 39.1               | 157.8 $\pm$ 36.7 | 151.4 $\pm$ 37.2 | 0.91               | 0.54     | 0.48     |
| Glucose after 2 h in an oral glucose tolerance test (mg/dL) | 128.5 $\pm$ 34.0               | 133.4 $\pm$ 34.6 | 126.2 $\pm$ 37.0 | 0.32               | 0.72     | 0.24     |
| Daily insulin requirement [unit]                            | 16.3 $\pm$ 21.1                | 20.3 $\pm$ 35.5  | 12.7 $\pm$ 20.7  | 0.95               | 0.15     | 0.16     |
| Body mass before pregnancy [kg]                             | 72.8 $\pm$ 18.3                | 73.6 $\pm$ 16.6  | 73.7 $\pm$ 15.9  | 0.60               | 0.59     | 0.94     |
| Body mass at birth [kg]                                     | 85.2 $\pm$ 17.9                | 84.8 $\pm$ 15.4  | 85.3 $\pm$ 12.7  | 0.81               | 0.80     | 0.43     |
| Body mass increase during pregnancy [kg]                    | 12.3 $\pm$ 7.2                 | 11.2 $\pm$ 6.1   | 11.5 $\pm$ 8.9   | 0.33               | 0.81     | 0.60     |
| BMI before pregnancy [kg/m <sup>2</sup> ]                   | 26.5 $\pm$ 6.3                 | 26.6 $\pm$ 5.8   | 26.8 $\pm$ 5.9   | 0.74               | 0.77     | 0.90     |
| BMI at birth [kg/m <sup>2</sup> ]                           | 31.1 $\pm$ 6.2                 | 30.7 $\pm$ 5.4   | 31.0 $\pm$ 4.9   | 0.66               | 0.97     | 0.50     |
| BMI increase during pregnancy [kg/m <sup>2</sup> ]          | 4.5 $\pm$ 2.7                  | 4.1 $\pm$ 2.2    | 4.2 $\pm$ 3.2    | 0.29               | 0.82     | 0.67     |
| Newborn body mass [g]                                       | 3279 $\pm$ 526                 | 3244 $\pm$ 627   | 3359 $\pm$ 435   | 0.71               | 0.64     | 0.27     |
| APGAR [0-10]                                                | 9.4 $\pm$ 1.0                  | 9.2 $\pm$ 1.2    | 9.2 $\pm$ 0.9    | 0.14               | 0.09     | 0.81     |

<sup>&</sup> Mann-Whitney U test.
